# Supplementary material
Source: PubMed Central journal article supplement (PMC4792230)
Supplement: me-15-1281.pdf [file me-15-1281.pdf]

**Supplemental Table 1. Primer sets for SNARE qRT-PCR**

| Gene         | Assession No.  | Sequence                                        |
|--------------|----------------|-------------------------------------------------|
| Rattus STX2  | NM_012748.1    | TAAGAAAGCCATCAAATACCAG<br>TCAAGCCAATGATTAGAGCC  |
| Rattus STX3  | NM_031124.1    | AAGGCACGGGATGAAACTA<br>ACAATCCAATAATCAACGCTA    |
| Rattus STX4  | NM_031125.1    | CAGAAGAAGGCGAGGAAGAAA<br>GGTTATGGTGATGCCAATGAT  |
| Rattus STX5  | NM_031704.2    | GCTACGGATCTAAGAACACGGA<br>GTGGGCAAAGGAGCGATGT   |
| Rattus STX6  | NM_031665.2    | CGCAGCATAGAGTGGGATCT<br>CCCTGACAATTTGCCGAGTA    |
| Rattus STX7  | NM_021869.2    | CAGCCAGCCATGTCTTACAC<br>TTCCCAGTTGATTCAGAGTCCTT |
| Rattus STX8  | NM_031656.2    | AACTGGACGAACAGAACGAG<br>CACCATTATCATCCCACAGG    |
| Rattus STX11 | NM_001025638.1 | CCAGGCCGAGATGAAACAAC<br>CGGAGAATACATCCCCTTGC    |
| Rattus STX12 | NM_022939.2    | GAGTAAGAACACTGCACCCATG<br>GGACTCCGTAAACAACACCC  |
| Rattus STX16 | NM_001108610.1 | GACGAAATACAGTATGATGTTGG<br>GTGACCTCCTGGGTAGTGAT |
| Rattus STX18 | NM_001012151.1 | TGCCAGTGCCCTGTATGCT<br>AGGAGGCGTGCTGTATCCTT     |
| Mus STX3     | NM_152220.1    | GGATACGAAAGTCCCAGCAC<br>CGTTCACGGAAGTCCACCT     |
| Mus STX5     | NM_019829.4    | GGAAACGCTACGGATCTAAG<br>AGTGCTGTCACTGCTGCTAC    |
| Mus STX7     | NM_016797.4    | CAACCAGCCATGTCTTACAC<br>TTCCAAGTTGATTCAGAGTCCTT |
| Mus STX8     | NM_018768.2    | ACTGCTCCTGGCATCGTT<br>GCTTTGCTTCTTCGCTCAT       |
| Mus STX11    | NM_029075.1    | CCAGGCCGAGATGAAACAGC<br>CGGAGAATACATCCCCTTGC    |
| Mus STX12    | NM_133887.4    | TAGAAGCCAATGTGGAAAGC<br>CAGGACAAGCACGAGGATAC    |
| Mus STX16    | NM_172675.4    | GACGAAATACAGTATGATGTTGG<br>GTGACTTCCTGGGTGGTGAT |
| Mus STX18    | NM_026959.2    | CGTTTTGGATTTGTTGAC<br>TCTTGGTATGTGGCTCAGGT      |

**Supplemental Table 2. Primers for SNARE PCR amplification**

| Gene/Species          | Assession No. | Sequence                                                    |
|-----------------------|---------------|-------------------------------------------------------------|
| StAR N-62<br>mouse    | NM_0011485.4  | TATGGATCCGGAAGCAACACTC<br>TTAGGATCCTTAACACTGGGC             |
| SNAP23<br>human       | NM_003825.3   | TCCGGATCCGATGGATAATCTG<br>TCCGGATCCTTAGCTGTCAATG            |
| SNAP25<br>human       | NM_003081.3   | TATGGATCCGATGGCCGAAGAC<br>TCCGGATCCTTAACCACTTCC             |
| NSF<br>human          | NM_006178.3   | TTTATTACATATGATGGCGGGCCGG<br>TGGCTCGCATATGTCAATCAAATC       |
| NSF $\alpha$<br>human | NM_0038727.3  | TCTGGATCCGATGGACAATTCC<br>TTAGGATCCTTAGCGCAGGTCC            |
| STX17<br>rat          | NM_145723.1   | TCTGGATCCGATGTCCGAAGAT<br>TCCGGATCCTAACTGACTTTTTTG          |
| STX7<br>rat           | NM_021869.2   | CGCGGATCCCATGTCTTACACTCCGGG<br>CGCGGATCCTCTCAGCCTTTCAGACCCC |
